# Supplementary material for: Sustainable agro-waste pellets as granular slow-release fertilizer carrier systems for ammonium sulfate
Source: Royal Society of Chemistry journal article supplement (doi:10.1039/d4su00141a), 2024-01-01
Supplement: d4su00141a1.pdf [file d4su00141a1.pdf]

## **ELECTRONIC SUPPLEMENTARY MATERIAL**

# **Sustainable agro-waste pellets as granular slow-release fertilizer carrier systems for ammonium sulfate**

**Bernd G.K. Steiger<sup>1</sup>, Nam Bui<sup>1</sup>, Bolanle M. Babalola<sup>1</sup> and Lee D. Wilson<sup>1\*</sup>**

<sup>a</sup>Department of Chemistry, University of Saskatchewan, 110 Science Place - Room 156 Thorvaldson Building, Saskatoon, SK S7N 5C9, Canada

\*Corresponding author: L. D. Wilson (Tel. +1-306-966-2961; [lee.wilson@usask.ca](mailto:lee.wilson@usask.ca))

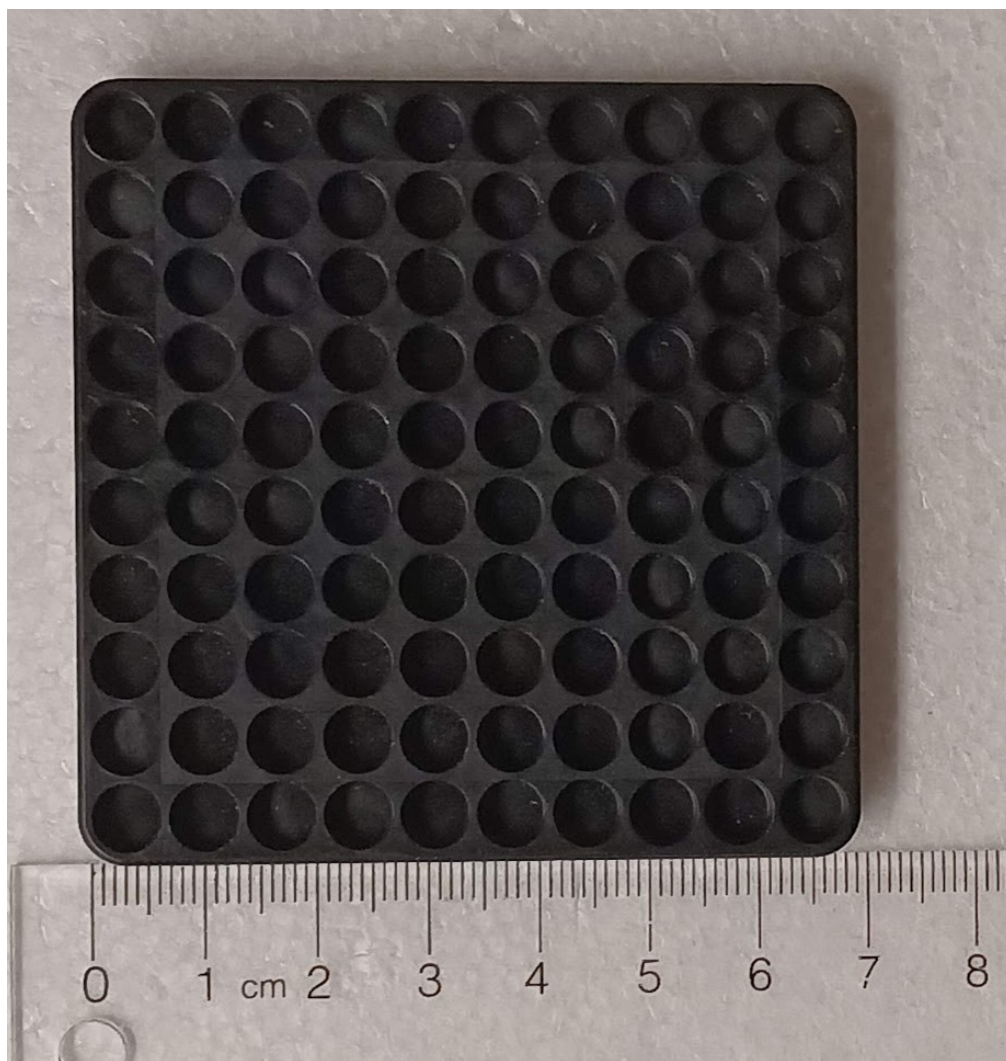

**Figure S1:** Picture of the mold/tray used to prepare the samples with scale (ca. 5.74mm diameter and 3.3 mm depth).

**Table S1:** Dimension of the round pellets in mm (sample size = 10).

|            | <b>Diameter<br/>(mm)</b> | <b>Height<br/>(mm)</b> |
|------------|--------------------------|------------------------|
| <b>C1</b>  | 5.60 ± 0.13              | 2.62 ± 0.16            |
| <b>C72</b> | 5.75 ± 0.09              | 2.77 ± 0.12            |
| <b>C20</b> | 5.13 ± 0.18              | 2.42 ± 0.20            |
| <b>C21</b> | 5.11 ± 0.17              | 2.49 ± 0.21            |
| <b>C22</b> | 5.06 ± 0.23              | 2.46 ± 0.14            |

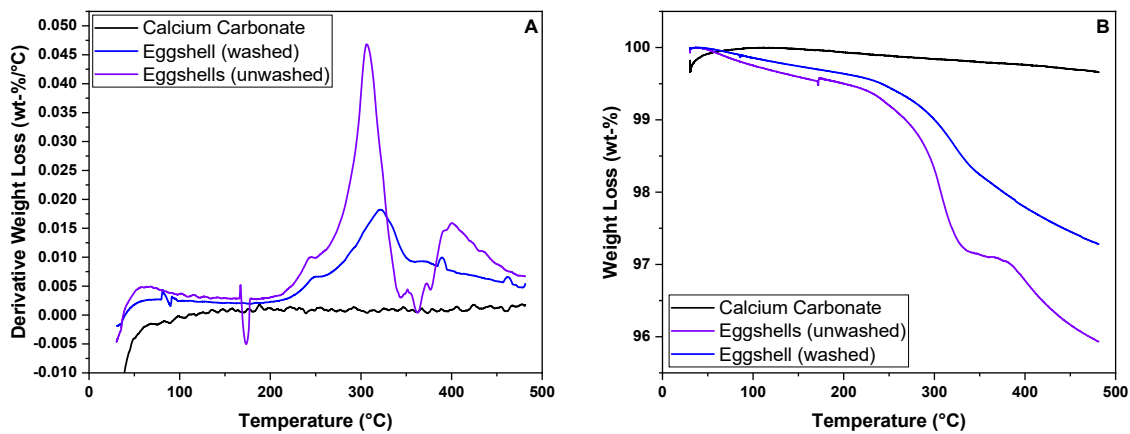

**Figure S2:** DTG profiles (A) of pristine calcium carbonate as comparison to eggshells (washed) and their weight loss profiles respectively (B).

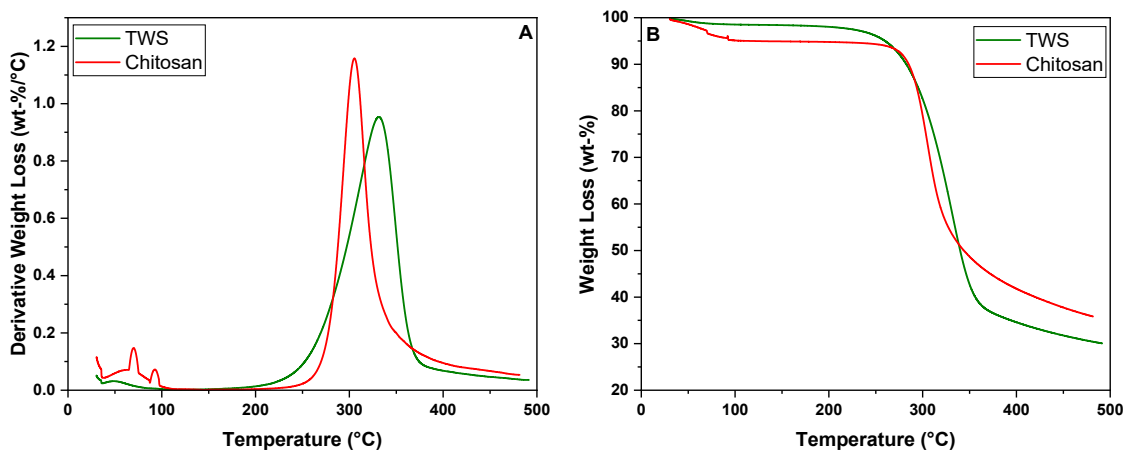

**Figure S3:** DTG profiles (A) of torrefied wheat straw (TWS) and chitosan and their TG profiles (B) respectively.

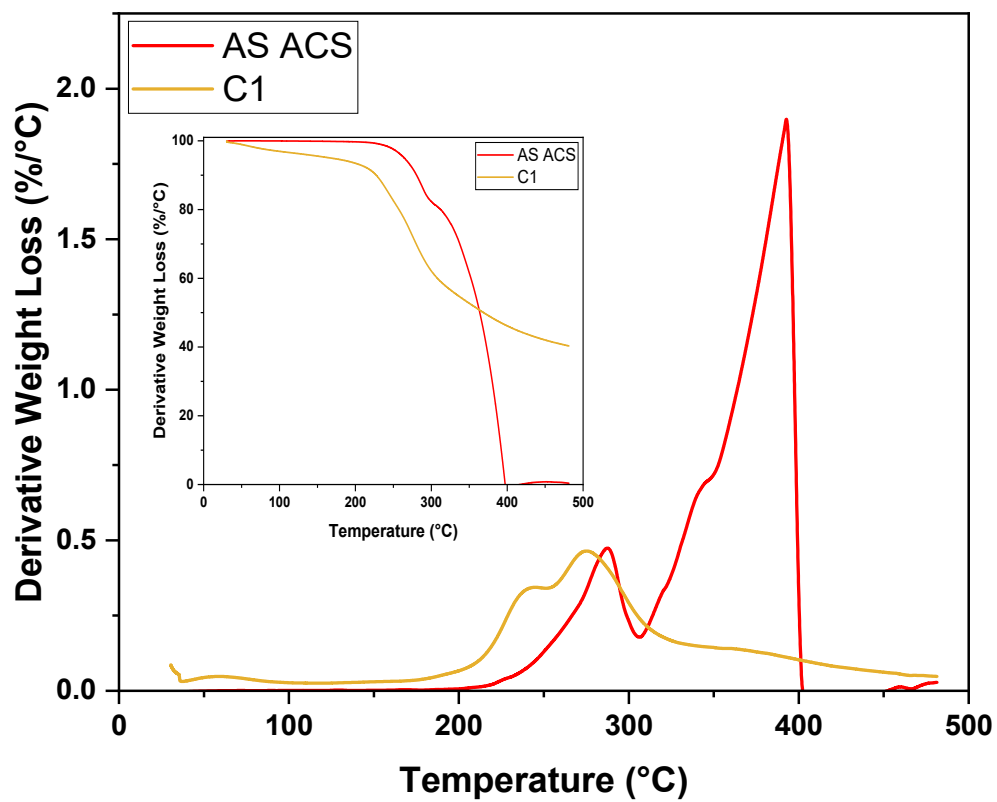

Figure S4: DTG profiles of ammonium sulfate (ACS grade) in comparison to C1 (TG profile as inset).

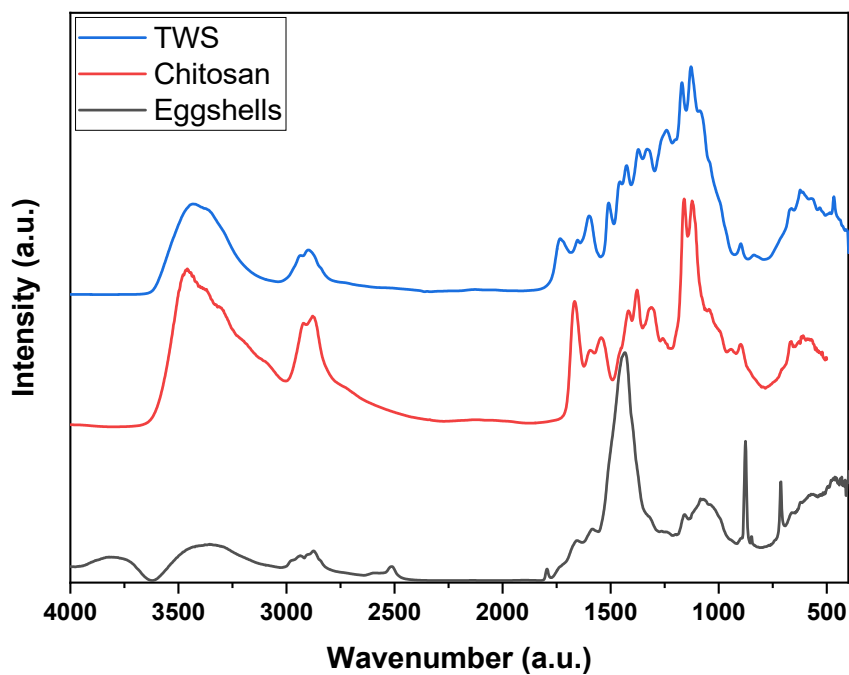

Figure S5: FT-IR Spectra of the raw materials used to prepare the pelletized adsorbents.

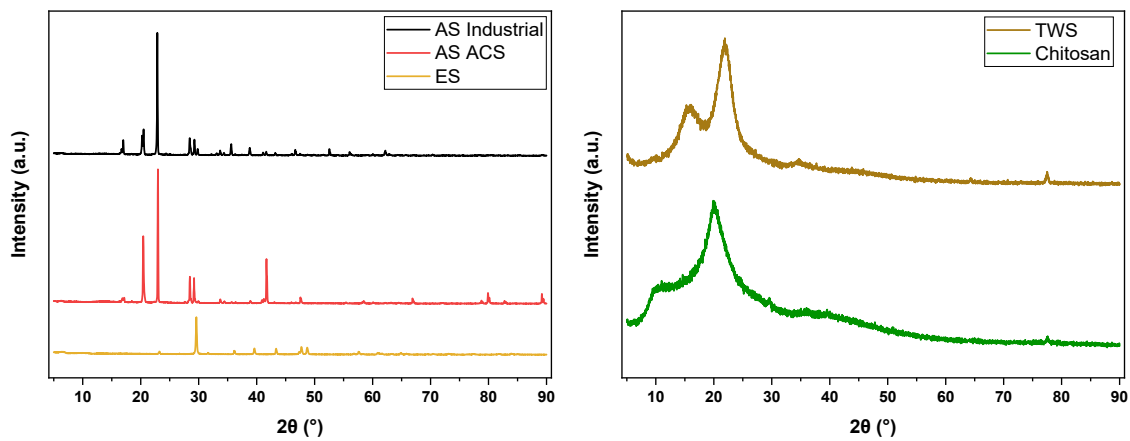

Figure S6: PXRD of the raw materials (eggshell, industrial and ACS grade ammonium sulfate on the left) and TWS and chitosan on the right.

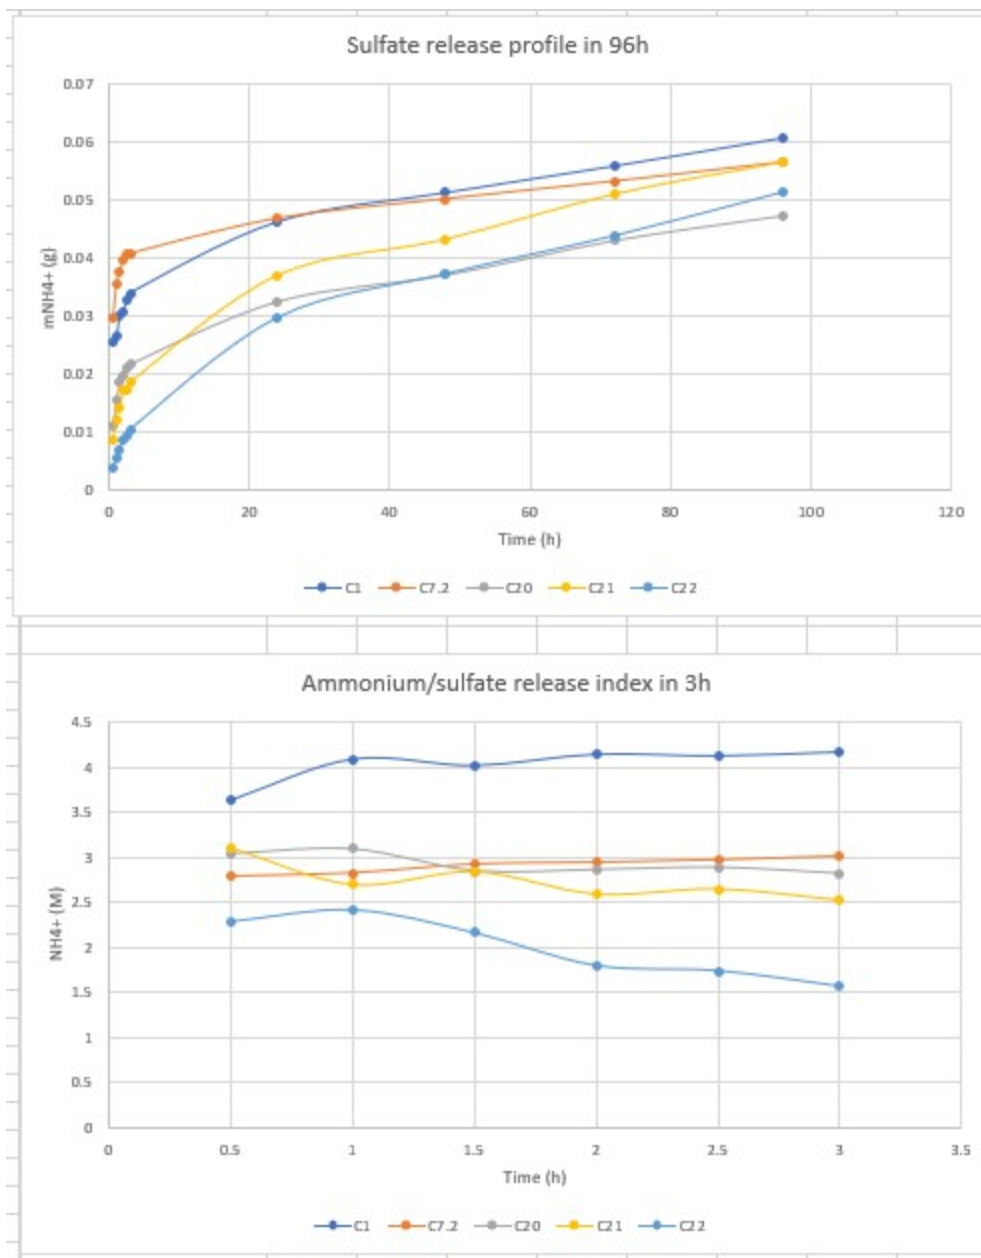

Figure S7: Sulfate release (g; upper graph) vs. molar ratio of ammonium to released sulfate (lower graph).

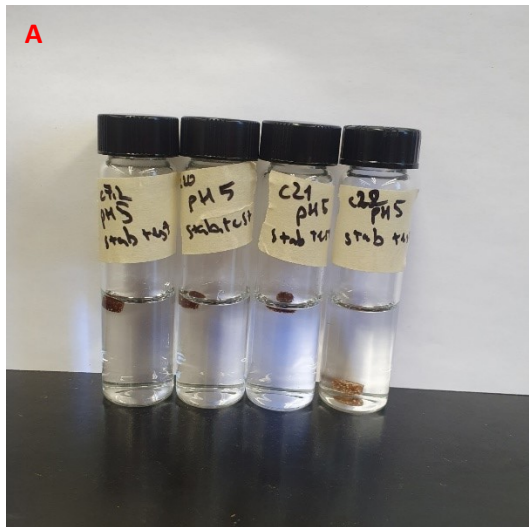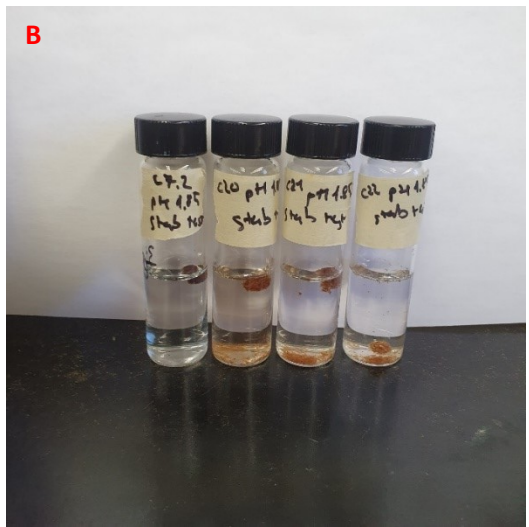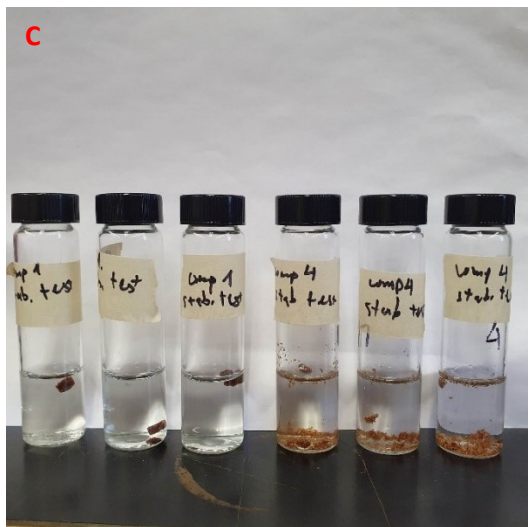

**Figure S8:** Stability of pellet systems (CW72,CW20-22) at pH 5 (A) and pH 1.85 (B), as well as preliminary testing of C1 and C4 in millipore water (C).

**Table S2:** Multi-factorial Analysis (ANOVA) for the granular SRFs and time as the main factors (ammonium release).

| Source       | Sum of squares | df | Mean square | F       | Significance |
|--------------|----------------|----|-------------|---------|--------------|
| Main effects |                |    |             |         |              |
| • Pellets    | 3,00334        | 4  | 0,750834    | 6145,01 | 0,0000       |
| • Time       | 0,00381111     | 2  | 0,00190556  | 15,60   | 0,0001       |
| Residual     | 0,00281028     | 23 | 0,000122186 |         |              |
| Total        | 3,00996        | 29 |             |         |              |

**Table S3:** ANOVA statistical analysis results for all pellet systems and time as main factors (cases:2) combined for all three time periods (3 h, 24 h, 48 h) resulting in 6 cases total (ammonium release).

| Pellets | Cases | LS Mean  | Homogeneous groups |
|---------|-------|----------|--------------------|
| C22     | 6     | 0,09055  | A                  |
| C21     | 6     | 0,225675 | B                  |
| C20     | 6     | 0,364678 | C                  |
| C72     | 6     | 0,610587 | D                  |
| C1      | 6     | 0,98677  | E                  |
